# Supplementary material
Source: MDPI journal article supplement (https://www.mdpi.com/2673-4931/19/1/49)
Supplement: s1 [file s1]

Supplementary Materials

# Usefulness of UAV-Mounted Multi-Sensors System for In Situ Atmospheric Measurement: A Case Study from Wrocław, Poland <sup>†</sup>

Anetta Drzeniecka-Osiadacz <sup>\*</sup>, Tymoteusz Sawiński, Magdalena Korzystka-Muskala, Marek Kowalczyk and Piotr Modzel

Department of Climatology and Atmosphere Protection, Institute of Geography and Regional Development, University of Wrocław, LIFE-MAPPINGAIR/PL Project, Kosiby 8 Str., 51-621 Wrocław, Poland; tymoteusz.sawinski@uwr.edu.pl (T.S.); magdalena.korzystka-muskala@uwr.edu.pl (M.K.-M.); marek.kowalczyk@uwr.edu.pl (M.K.); piotr.modzel@uwr.edu.pl (P.M.)

<sup>\*</sup> Correspondence: anetta.drzeniecka-osiadacz@uwr.edu.pl

<sup>†</sup> Presented at the 5th International Electronic Conference on Atmospheric Sciences, 16–31 July 2022; Available online: <https://ecas2022.sciforum.net/>.

**Table S1.** The description of the measurement campaigns. All meteorological data are public available via <https://opendata.meteo.uni.wroc.pl/> (accessed on 1 June 2022).

| Date       | Drone measurements |                 |             |            | Stationary measurements at the Observatory of University of Wrocław |                                         |         |        |        |                       |
|------------|--------------------|-----------------|-------------|------------|---------------------------------------------------------------------|-----------------------------------------|---------|--------|--------|-----------------------|
|            | No of profile      | Type of landuse | Start [UTC] | LON LAT    | PM <sub>10</sub> [µg m <sup>-3</sup> ]                              | PM <sub>2.5</sub> [µg m <sup>-3</sup> ] | P [hPa] | T [°C] | RH [%] | V [ms <sup>-1</sup> ] |
| 06.10.2019 | SE 19:10           | suburban        | 19:10       |            | 42.3                                                                | 40.5                                    | 1004.6  | 1.7    | 88.2   | 0.5                   |
|            | SE 19:34           |                 | 19:34       | 17.1014    | 50.4                                                                | 49.0                                    | 1004.3  | 1.4    | 89.7   | 0.6                   |
|            | SE 22:21           |                 | 22:21       | 51.1103    | 27.6                                                                | 27.7                                    | 1004.1  | -0.8   | 95.2   | 0.4                   |
|            | SE 22:37           |                 | 22:37       |            | 27.9                                                                | 28.2                                    | 1004.1  | -1.1   | 94.8   | 0.5                   |
|            | SE 19:58           |                 | 19:58       | 17.1014    | 77.5                                                                | 66.4                                    | 1015.6  | -2.0   | 100.0  | 0.7                   |
| 30.10.2019 | SE 20:16           | suburban        | 20:16       | 51.1103    | 80.2                                                                | 75.5                                    | 1015.5  | -2.3   | 99.7   | 0.5                   |
|            | GS 21:19           |                 | 21:19       | 17.0443    | 70.1                                                                | 69.3                                    | 1015.2  | -2.8   | 99.5   | 0.4                   |
|            | GS 21:41           |                 | 21:41       | 51.1252    | 81.4                                                                | 74.8                                    | 1015.1  | -3.0   | 100.0  | 0.4                   |
|            | SE 22:27           |                 | 22:27       | 17.1015    | 63.3                                                                | 63.2                                    | 1014.8  | -3.1   | 100.0  | 0.5                   |
|            | SE 22:44           |                 | 22:44       | 51.1103    | 47.9                                                                | 49.8                                    | 1014.6  | -2.9   | 100.0  | 0.3                   |
| 12.12.2019 | GS 19:20           | urban           | 19:20       |            | 42.9                                                                | 36.8                                    | 988.9   | 0.3    | 73.0   | 1.2                   |
|            | GS 19:42           |                 | 19:42       |            | 49.5                                                                | 44.5                                    | 988.5   | 0.3    | 73.2   | 0.9                   |
|            | GS 20:18           |                 | 20:18       | 17.0443    | 46.6                                                                | 42.4                                    | 988.0   | 0.1    | 74.2   | 0.9                   |
|            | GS 20:38           |                 | 20:38       | 51.1251    | 43.0                                                                | 38.8                                    | 987.8   | 0.1    | 75.1   | 1.0                   |
|            | GS 20:56           |                 | 20:56       |            | 39.2                                                                | 35.6                                    | 987.6   | 0.1    | 75.0   | 0.8                   |
| 24.01.2020 | GS 21:11           | suburban        | 21:11       |            | 36.7                                                                | 33.2                                    | 987.4   | -0.2   | 75.5   | 1.0                   |
|            | SE 9:39            |                 | 09:39       | 17.1015    | 29.8                                                                | 30.3                                    | 1008.7  | 1.1    | 67.6   | 2.0                   |
|            | SE 9:52            |                 | 09:52       | 51.1103    | 22.2                                                                | 37.5                                    | 1008.6  | 1.6    | 64.4   | 1.8                   |
|            | W 07:05            |                 | 07:05       | 17.1195    | 39.3                                                                | 27.9                                    | 1015.9  | 5.3    | 88.7   | 2.3                   |
|            | W 07:19            |                 | 07:19       | 51.1389    | 39.5                                                                | 27.4                                    | 1015.9  | 5.3    | 88.2   | 2.2                   |
| 10.11.2020 | W 07:55            | rural           | 07:55       |            | 38.5                                                                | 28.0                                    | 1015.9  | 5.3    | 87.3   | 2.5                   |
|            | W 08:18            |                 | 08:18       | horizontal | 35.9                                                                | 27.1                                    | 1015.9  | 5.3    | 86.8   | 2.4                   |
|            | W 07:1             |                 | 07:11       | 17.1195    | 32.6                                                                | 18.8                                    | 1007.8  | 6.0    | 87.2   | 0.9                   |
|            | W 07:27            |                 | 07:27       | 51.1389    | 32.6                                                                | 19.4                                    | 1007.8  | 6.4    | 87.0   | 1.1                   |
|            | W 07:42            |                 | 07:42       | horizontal | 32.0                                                                | 19.1                                    | 1007.8  | 6.9    | 84.9   | 1.2                   |
| 13.11.2020 | W 08:15            | suburban        | 08:15       |            | 33.3                                                                | 20.0                                    | 1007.8  | 8.0    | 78.8   | 1.1                   |
|            | SE 17:22           |                 | 17:22       | 17.1014    | 34.2                                                                | 28.8                                    | 1010.3  | 0.2    | 84.5   | 1.2                   |
|            | SE 17:41           |                 | 17:41       | 51.1103    | 31.6                                                                | 27.4                                    | 1010.8  | -0.1   | 83.8   | 0.6                   |
|            | W 19:00            |                 | 19:00       | 17.1195    | 36.1                                                                | 31.3                                    | 1010.3  | -1.0   | 86.7   | 1.3                   |
|            | W 19:17            |                 | 19:17       | 51.1389    | 32.3                                                                | 28.3                                    | 1010.2  | -1.0   | 87.3   | 1.5                   |
| 24.11.2020 | W 19:35            | rural           | 19:35       |            | 27.3                                                                | 26.5                                    | 1010.2  | -1.1   | 87.2   | 0.6                   |
|            | W 19:59            |                 | 19:59       | horizontal | 30.6                                                                | 30.7                                    | 1010.1  | -1.5   | 86.6   | 0.4                   |
|            | W 07:05            |                 | 07:05       | 17.1195    | 30.4                                                                | 18.6                                    | 1007.4  | -4.5   | 86.8   | 0.5                   |
|            | W 07:19            |                 | 07:19       | 51.1389    | 31.4                                                                | 18.3                                    | 1007.4  | -4.1   | 87.4   | 0.6                   |

|            |          |       |            |      |      |        |      |      |     |
|------------|----------|-------|------------|------|------|--------|------|------|-----|
| 17.12.2020 | W 07:39  | 07:39 | horizontal | 38.2 | 21.1 | 1007.4 | -3.6 | 87.8 | 0.7 |
|            | SE 06:53 | 06:53 |            | 18.9 | 13.5 | 1009.2 | 3.9  | 80.1 | 1.3 |
|            | SE 07:06 | 07:06 | 17.1014    | 17.3 | 12.6 | 1009.2 | 3.9  | 79.8 | 1.4 |
|            | SE 08:18 | 08:18 | 51.1103    | 17.0 | 11.0 | 1009.0 | 3.5  | 77.7 | 2.0 |
|            | SE 08:47 | 08:47 |            | 20.8 | 13.4 | 1009.0 | 3.8  | 75.6 | 1.4 |

T – air temperature, P – atmospheric pressure, RH – relative humidity, V – wind speed.

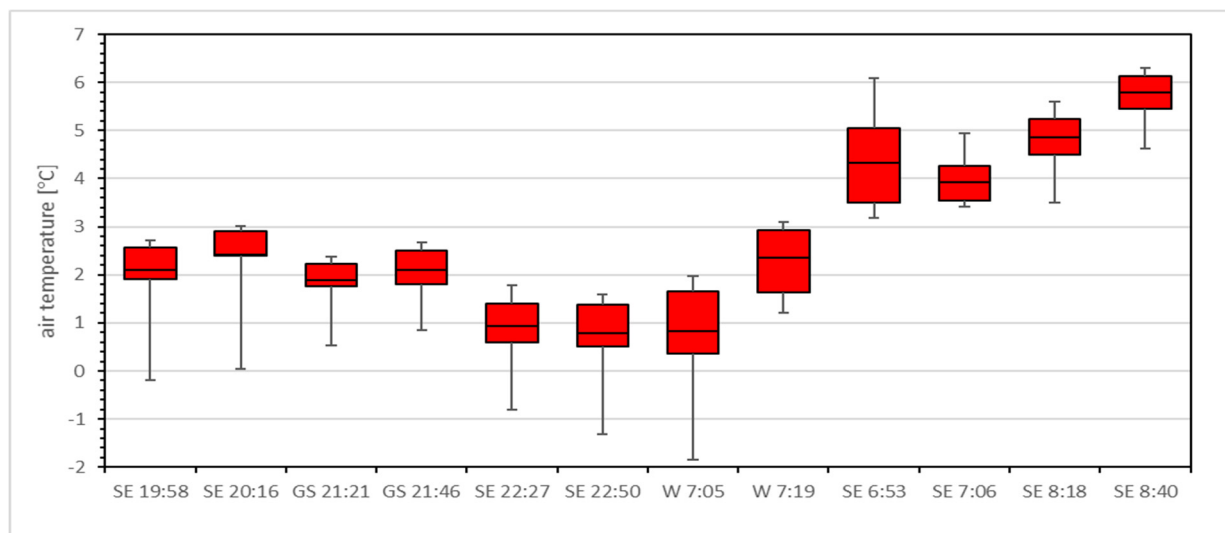

(a)

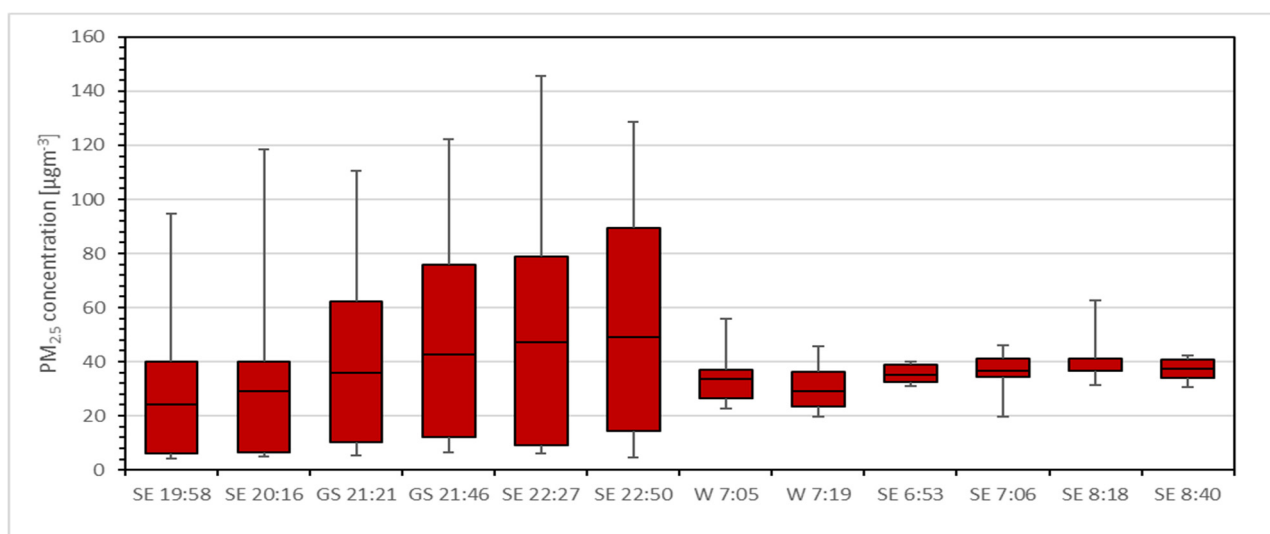

(b)

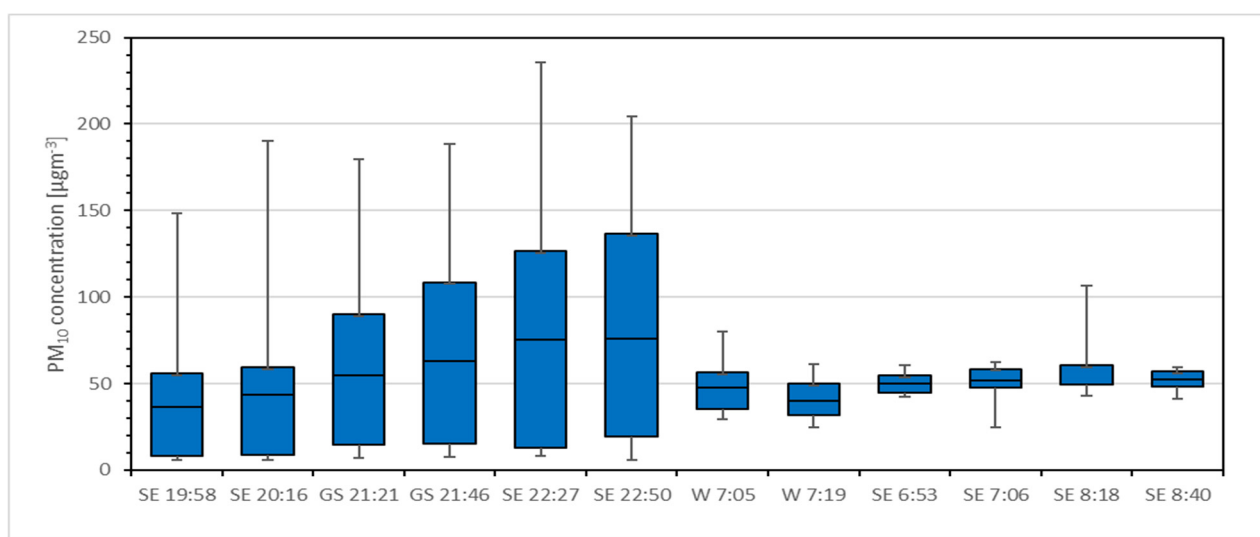

(c)

**Figure S1.** Whisker plots describing general characteristics of temperature (a) and particulate matter PM<sub>2.5</sub> (b) and PM<sub>10</sub> (c) from drone measurements during selected field researches.
